# Supplementary material for: Genes associated with genotype-specific DNA methylation in squamous cell carcinoma as candidate drug targets
Source: PubMed Central journal article supplement (PMC4080267; doi:10.1186/1752-0509-8-s1-s4), 2014-01-24
Supplement: 1752-0509-8-S1-S4-S2.pdf [file 1752-0509-8-S1-S4-S2.pdf]

|    | Gene symbol    | Nsp | Sty 1 | Sty 2 |     | Gene symbol       | Nsp | Sty 1 | Sty 2 |
|----|----------------|-----|-------|-------|-----|-------------------|-----|-------|-------|
| 1  | A2BP1          | ○   |       |       | 51  | FLJ20323          |     | ○     |       |
| 2  | ADK            |     |       | ○     | 52  | FLJ32110          | ○   |       |       |
| 3  | AFF3           |     |       | ○     | 53  | FLJ32955          | ○   |       |       |
| 4  | <b>ALK</b>     |     |       | ○     | 54  | FLJ33360          |     | ○     |       |
| 5  | ALS2CR13       | ○   |       |       | 55  | FLJ42393          | ○   | ○     | ○     |
| 6  | <b>ASB3</b>    |     |       | ○     | 56  | FLNB              |     |       | ○     |
| 7  | <b>AVO3</b>    | ○   |       |       | 57  | FLRT2             | ○   |       |       |
| 8  | <b>AVPR1A</b>  | ○   |       |       | 58  | FSIP2             | ○   |       |       |
| 9  | <b>B3GNT5</b>  | ○   |       |       | 59  | GLIS3             |     |       | ○     |
| 10 | <b>BCL6</b>    | ○   |       | ○     | 60  | GMEB2             | ○   |       |       |
| 11 | BICD1          | ○   | ○     |       | 61  | GOLPH4            |     | ○     |       |
| 12 | BMP2           | ○   |       |       | 62  | <b>GRHL2</b>      |     | ○     |       |
| 13 | <b>BRF1</b>    | ○   |       |       | 63  | <b>GZMB</b>       |     |       | ○     |
| 14 | C10orf26       |     |       | ○     | 64  | HAO1              | ○   |       |       |
| 15 | C18orf18       | ○   | ○     |       | 65  | <b>HEBP1</b>      | ○   |       |       |
| 16 | <b>C1GALT1</b> |     | ○     |       | 66  | <b>HEY1</b>       |     | ○     |       |
| 17 | C20orf114      |     |       | ○     | 67  | <b>ICA1</b>       | ○   |       |       |
| 18 | C20orf129      | ○   |       | ○     | 68  | <b>IL1RAP</b>     |     |       | ○     |
| 19 | C22orf13       |     |       | ○     | 69  | <b>IMP-2</b>      |     | ○     |       |
| 20 | C3orf21        |     |       | ○     | 70  | IMPA1             |     |       | ○     |
| 21 | <b>CA10</b>    | ○   |       |       | 71  | <b>IREB2</b>      |     |       | ○     |
| 22 | <b>CAMK1D</b>  | ○   |       |       | 72  | <b>K6HF</b>       | ○   |       |       |
| 23 | <b>CBLB</b>    | ○   |       |       | 73  | KCNB2             |     | ○     |       |
| 24 | <b>CCND1</b>   |     | ○     |       | 74  | KCNMB3            |     | ○     |       |
| 25 | <b>CCNL1</b>   |     |       | ○     | 75  | <b>KCNN3</b>      |     |       | ○     |
| 26 | <b>CD36</b>    | ○   |       |       | 76  | KIAA1467          | ○   |       |       |
| 27 | <b>CD96</b>    | ○   |       |       | 77  | KIF2B             | ○   |       |       |
| 28 | <b>CKAP4</b>   |     |       | ○     | 78  | <b>KLHL6</b>      | ○   |       |       |
| 29 | <b>CLYBL</b>   |     |       | ○     | 79  | KRTHB2            | ○   |       |       |
| 30 | COL22A1        |     |       | ○     | 80  | LOC131368         | ○   |       |       |
| 31 | CPAMD8         | ○   |       |       | 81  | LOC387882         | ○   |       |       |
| 32 | <b>CRABP1</b>  |     |       | ○     | 82  | LOC494143         |     |       | ○     |
| 33 | DHX35          | ○   |       | ○     | 83  | LOC92196          |     | ○     |       |
| 34 | DKFZp564N2472  | ○   |       |       | 84  | LONRF2            |     |       | ○     |
| 35 | DLGAP1         | ○   | ○     |       | 85  | <b>LPP</b>        |     | ○     |       |
| 36 | DNAH11         | ○   |       |       | 86  | LYPLAL1           | ○   |       |       |
| 37 | <b>DNCI1</b>   |     |       | ○     | 87  | <b>MAFB</b>       | ○   |       | ○     |
| 38 | <b>EDN2</b>    | ○   |       |       | 88  | <b>MCF2L2</b>     | ○   |       |       |
| 39 | <b>EGLN3</b>   |     | ○     |       | 89  | MGC2654           | ○   |       |       |
| 40 | <b>EVI1</b>    |     | ○     |       | 90  | <b>MGC26647</b>   | ○   |       |       |
| 41 | <b>EXT1</b>    | ○   |       |       | 91  | MGC33530          | ○   |       |       |
| 42 | <b>F2RL3</b>   | ○   |       |       | 92  | <b>MYEOV</b>      |     | ○     |       |
| 43 | <b>FADD</b>    |     | ○     |       | 93  | MYO1B             | ○   |       |       |
| 44 | FAM84B         |     |       | ○     | 94  | <b>MYST4</b>      |     |       | ○     |
| 45 | <b>FGF12</b>   |     | ○     |       | 95  | NFKBIZ            | ○   |       |       |
| 46 | <b>FGF19</b>   | ○   |       |       | 96  | <b>NOP5/NOP58</b> | ○   |       |       |
| 47 | <b>FGF3</b>    |     | ○     | ○     | 97  | NPAS3             |     | ○     |       |
| 48 | <b>FH</b>      |     |       | ○     | 98  | <b>NRXN1</b>      |     |       | ○     |
| 49 | FLJ10652       | ○   | ○     |       | 99  | <b>NUAK1</b>      | ○   |       | ○     |
| 50 | FLJ16641       |     |       | ○     | 100 | <b>NXPH1</b>      | ○   |       |       |

|     | Gene symbol    | Nsp | Sty 1 | Sty 2 |     | Gene symbol   | Nsp | Sty 1 | Sty 2 |
|-----|----------------|-----|-------|-------|-----|---------------|-----|-------|-------|
| 101 | OSTN           |     |       | ○     | 151 | <b>ZFPM2</b>  | ○   |       |       |
| 102 | <b>PACS1</b>   |     |       | ○     | 152 | <b>ZNF138</b> | ○   |       |       |
| 103 | PDE4DIP        | ○   |       |       | 153 | <b>ZNF588</b> | ○   |       |       |
| 104 | <b>PDK4</b>    |     |       | ○     | 154 | <b>ZNF639</b> |     | ○     |       |
| 105 | <b>PIGO</b>    |     |       | ○     | 155 | <b>raptor</b> | ○   |       |       |
| 106 | <b>PIWIL1</b>  |     |       | ○     |     |               |     |       |       |
| 107 | PKIA           | ○   |       |       |     |               |     |       |       |
| 108 | <b>PKP4</b>    |     | ○     |       |     |               |     |       |       |
| 109 | <b>PLA2G4A</b> | ○   |       |       |     |               |     |       |       |
| 110 | <b>PLUNC</b>   |     |       | ○     |     |               |     |       |       |
| 111 | <b>PPFIA1</b>  |     | ○     |       |     |               |     |       |       |
| 112 | PSARL          |     | ○     |       |     |               |     |       |       |
| 113 | <b>PTPRT</b>   |     |       | ○     |     |               |     |       |       |
| 114 | <b>PVRL3</b>   | ○   |       |       |     |               |     |       |       |
| 115 | PXMP3          | ○   |       |       |     |               |     |       |       |
| 116 | <b>RAI17</b>   | ○   |       |       |     |               |     |       |       |
| 117 | <b>RAP2B</b>   | ○   |       |       |     |               |     |       |       |
| 118 | <b>RAPGEF5</b> | ○   |       |       |     |               |     |       |       |
| 119 | RASL12         |     |       | ○     |     |               |     |       |       |
| 120 | RGS7           |     |       | ○     |     |               |     |       |       |
| 121 | <b>RND3</b>    | ○   |       |       |     |               |     |       |       |
| 122 | <b>RPL14</b>   | ○   |       |       |     |               |     |       |       |
| 123 | <b>SAMD12</b>  | ○   |       |       |     |               |     |       |       |
| 124 | SCHIP1         | ○   |       |       |     |               |     |       |       |
| 125 | SCMH1          | ○   |       |       |     |               |     |       |       |
| 126 | SDK1           | ○   |       |       |     |               |     |       |       |
| 127 | <b>SEMA3C</b>  | ○   |       |       |     |               |     |       |       |
| 128 | <b>SEMA3E</b>  | ○   |       |       |     |               |     |       |       |
| 129 | <b>SENP2</b>   | ○   |       |       |     |               |     |       |       |
| 130 | <b>SFRS10</b>  |     | ○     |       |     |               |     |       |       |
| 131 | SFXN2          |     |       | ○     |     |               |     |       |       |
| 132 | SLC7A14        | ○   |       |       |     |               |     |       |       |
| 133 | <b>SMAD3</b>   |     |       | ○     |     |               |     |       |       |
| 134 | <b>STAT4</b>   | ○   |       |       |     |               |     |       |       |
| 135 | STAU2          | ○   |       |       |     |               |     |       |       |
| 136 | <b>STMN2</b>   |     | ○     |       |     |               |     |       |       |
| 137 | <b>STXBP6</b>  |     |       | ○     |     |               |     |       |       |
| 138 | TARBP1         | ○   |       |       |     |               |     |       |       |
| 139 | <b>TGFB2</b>   | ○   |       |       |     |               |     |       |       |
| 140 | TMC1           |     |       | ○     |     |               |     |       |       |
| 141 | <b>TMEM16A</b> |     | ○     | ○     |     |               |     |       |       |
| 142 | TNIK           |     |       | ○     |     |               |     |       |       |
| 143 | <b>TOMM7</b>   | ○   |       |       |     |               |     |       |       |
| 144 | TPCN2          |     | ○     |       |     |               |     |       |       |
| 145 | UNQ739         |     |       | ○     |     |               |     |       |       |
| 146 | <b>UPB1</b>    |     |       | ○     |     |               |     |       |       |
| 147 | VPS41          | ○   |       |       |     |               |     |       |       |
| 148 | <b>ZA20D2</b>  |     |       | ○     |     |               |     |       |       |
| 149 | <b>ZBED2</b>   | ○   |       |       |     |               |     |       |       |
| 150 | <b>ZBTB20</b>  |     |       | ○     |     |               |     |       |       |
