# Supplementary material for: Genes associated with genotype-specific DNA methylation in squamous cell carcinoma as candidate drug targets
Source: PubMed Central journal article supplement (PMC4080267; doi:10.1186/1752-0509-8-s1-s4), 2014-01-24

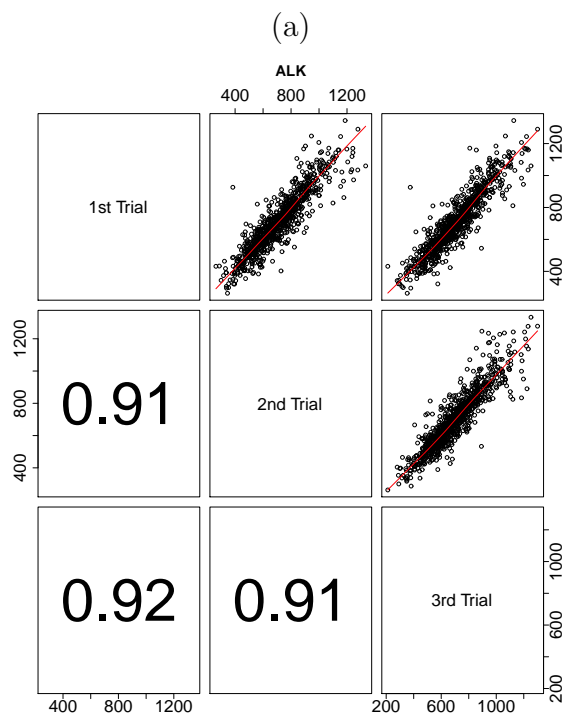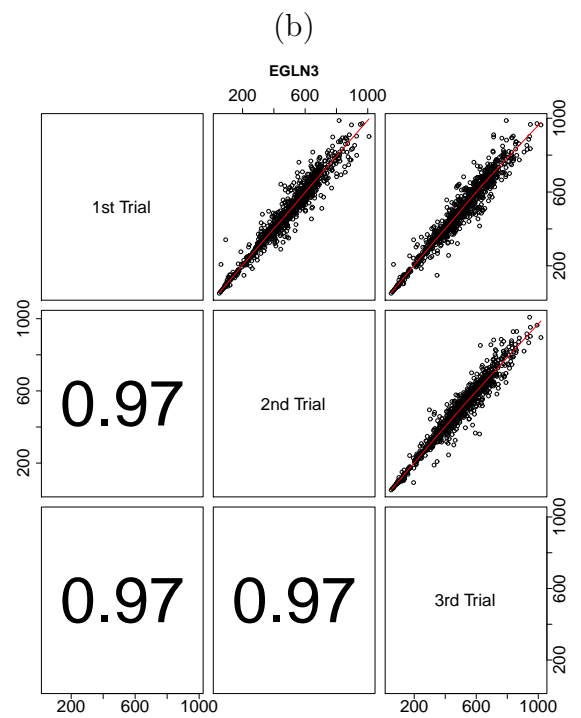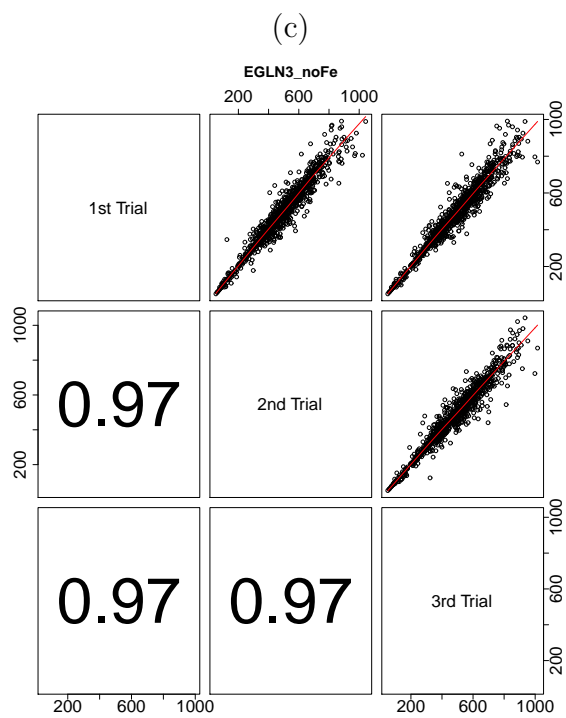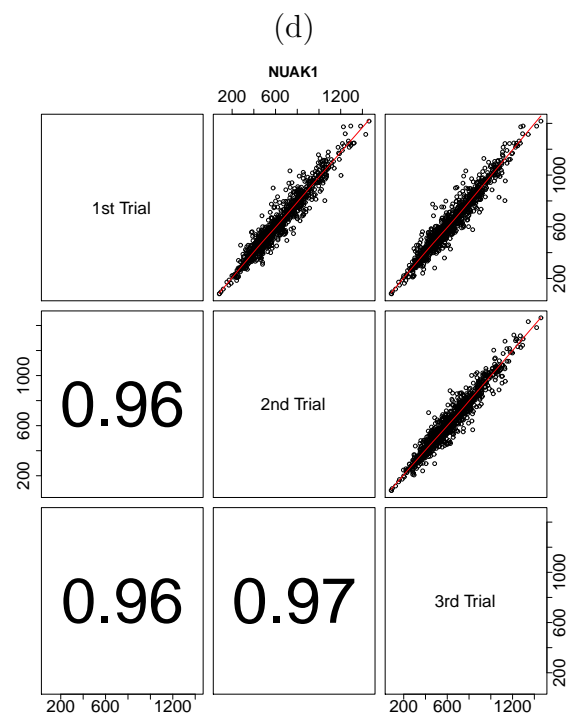

Supplement: 1752-0509-8-S1-S4-S6.pdf [file 1752-0509-8-S1-S4-S6.pdf]
