# Supplementary material for: Genes associated with genotype-specific DNA methylation in squamous cell carcinoma as candidate drug targets
Source: PubMed Central journal article supplement (PMC4080267; doi:10.1186/1752-0509-8-s1-s4), 2014-01-24

(a)

**ALK**

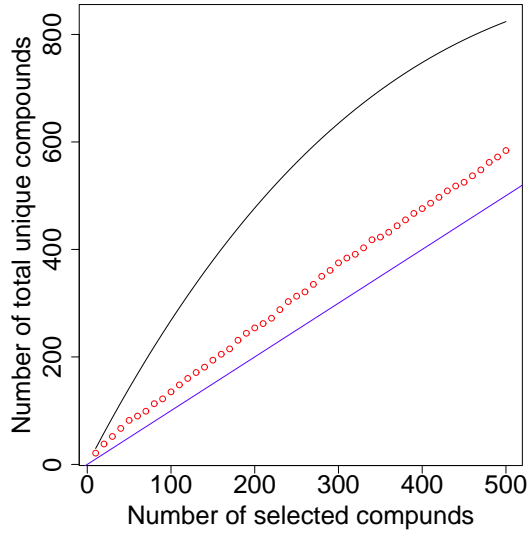

(b)

**EGLN3**

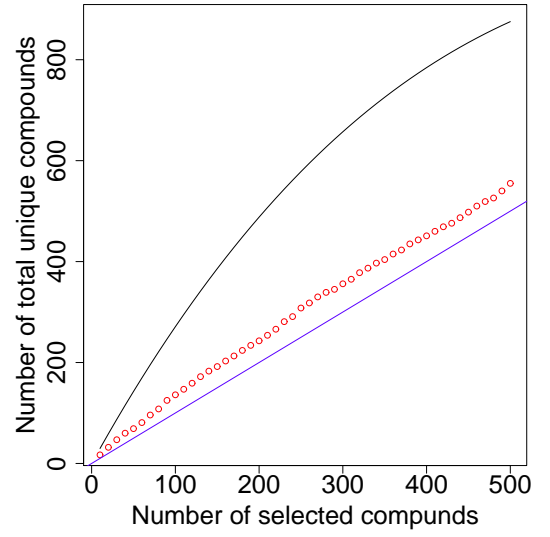

(c)

**EGLN3\_noFe**

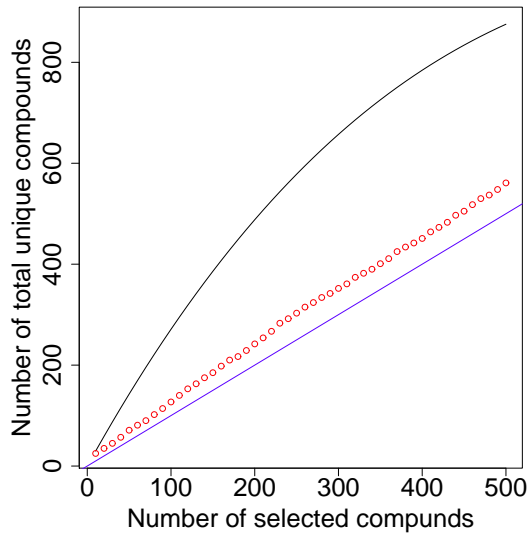

(d)

**NUAK1**

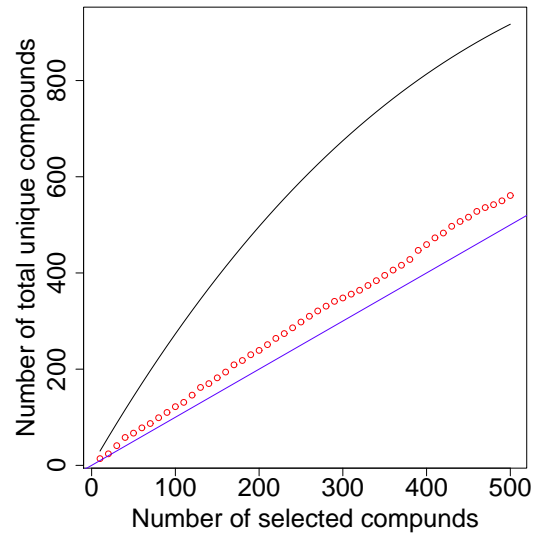

Supplement: 1752-0509-8-S1-S4-S7.pdf [file 1752-0509-8-S1-S4-S7.pdf]
